# Supplementary material for: Using Wearable Inertial Sensors to Estimate Kinematic Parameters and Variability in the Table Tennis Topspin Forehand Stroke
Source: Appl Bionics Biomech. 2020 May 10;2020:8413948. doi: 10.1155/2020/8413948 (PMC7238326; doi:10.1155/2020/8413948)
Supplement: Supplementary Materials — Table S1. [file 8413948.f1.xlsx]

## Sheet: 1
							Ready position					Backswing					Contact					Forward					Acceleration
	Player	ph1	ph2	ph3	ph4	TT	ShF	ElF	WrE	RKnF	LKnF	ShF	ElF	WrE	RKnF	LKnF	ShF	ElF	WrE	RKnF	LKnF	ShF	ElF	WrE	RKnF	LKnF	ACC
	1	0.241	0.199	0.301	0.7	1.441	20.358	66.135	98.953	42.796	40.139	-28.292	77.255	5.564	76.565	75.135	46.986	71.794	104.051	69.228	74.774	73.33	128.22	108.085	66.657	64.457	160.502
		0.229	0.202	0.303	0.711	1.445	19.743	66.563	96.519	37.841	40.247	-34.029	81.436	11.712	77.117	67.799	37.263	66.738	100.806	72.489	67.544	77.893	126.468	98.856	67.301	67.394	161.223
		0.379	0.187	0.294	0.586	1.446	8.624	48.533	85.446	48.161	45.328	-42.01	81.884	10.544	78.835	67.528	35.026	63.844	99.735	74.28	71.799	83.582	124.844	89.457	66.89	65.481	157.126
		0.236	0.185	0.298	0.743	1.462	11.578	62.886	94.953	36.587	38.466	-43.178	80.358	4.572	76.309	63.116	37.672	64.302	95.694	72.472	59.614	75.982	121.795	81.33	68.718	66.874	155.434
		0.254	0.194	0.287	0.703	1.438	11.454	61.527	92.385	40.126	38.59	-40.255	78.166	-0.769	75.28	65.101	33.415	59.573	94.978	71.212	67.001	80.325	116.641	72.718	69.69	61.802	156.996
		0.262	0.186	0.247	0.727	1.422	6.228	61.153	92.156	30.362	38.085	-49.843	76.629	-0.384	77.471	66.481	34.515	59.38	91.469	72.191	64.145	81.89	114.646	7.765	64.411	63.743	156.666
		0.54	0.175	0.258	0.477	1.45	7.999	45.088	67.77	50.188	44.168	-34.392	77.921	1.829	70.317	54.739	36.49	56.352	89.115	72.859	57.943	94.047	112.728	-52.935	65.477	59.046	158.523
		0.487	0.193	0.23	0.52	1.43	10.612	54.983	76.39	57.429	44.003	-32.32	72.555	-7.275	74.229	59.929	35.651	56.931	86.635	73.06	59.502	83.082	104.264	-8.87	73.595	55.03	158.599
		0.555	0.176	0.173	0.492	1.396	8.788	50.502	67.084	42.001	34.002	41.64	75.014	6.528	68.64	54.676	36.664	52.228	87.964	68.281	62.915	86.453	102.099	-48.449	70.457	56.091	156.576
		0.418	0.17	0.18	0.703	1.471	-0.932	51.491	79.004	31.94	36.646	52.782	74.627	7.568	69.618	54.469	30.093	56.419	85.164	76.879	54.655	96.708	104.08	-68.573	65.758	53.381	157.956
		0.317	0.241	0.172	0.963	1.693	11.742	68.071	88.107	46.561	46.674	221.153	62.547	-19.363	75.244	61.798	34.676	52.16	83.913	70.361	57.446	93.398	100.948	-72.192	77.691	47.117	156.761
	2	0.37	0.083	0.316	0.659	1.428	10.27	80.144	35.398	59.243	45.106	1.078	58.386	33.945	67.304	75.577	8.231	66.029	66.436	64.796	74.246	84.717	71.698	1.601	47.797	71.377	151.85
		0.579	0.095	0.304	0.452	1.43	21.44	79.343	33.922	62.351	56.159	33.682	64.456	22.127	72.993	79.481	18.318	66.32	62.136	65.775	74.316	76.116	67.584	-8.784	55.229	58.762	146.169
		0.437	0.093	0.318	0.614	1.462	13.778	76.974	38.083	61.898	48.273	-3.375	58.264	21.809	70.874	77.284	11.868	61.156	56.894	59.965	76.244	83.371	68.651	-13.404	50.51	54.537	137.101
		0.567	0.08	0.306	0.482	1.435	9.196	83.716	32.323	57.013	45.693	6.903	59.811	24.843	71.805	73.484	12.068	62.055	54.004	64.353	71.95	76.667	72.022	6.177	46.785	66.052	148.633
		0.524	0.098	0.301	0.52	1.443	2.688	83.259	34.697	57.178	42.42	-48.001	57.96	21.072	77.162	73.234	-61.788	60.797	53.985	67.054	72.53	92.275	73.109	2.366	45.331	63.623	147.803
		0.335	0.045	0.293	0.776	1.449	-48.479	74.093	37.637	61.361	31.864	-76.937	46.644	43.151	70.182	69.758	258.675	28.328	52.799	64.292	69.989	102.222	71.647	0.287	50.499	65.326	139.331
		0.503	0.074	0.302	0.579	1.458	18.321	82.247	38.43	64.328	37.912	0.186	54.456	34.489	75.093	65.199	21.904	34.989	58.007	70.954	62.847	183.823	72.3	-15.448	49.342	65.603	120.886
		0.421	0.079	0.313	0.663	1.476	21.979	75.619	41.66	59.898	32.071	-0.88	55.013	31.498	70.325	69.982	21.651	62.258	62.045	64.031	66.77	51.965	68.022	-8.06	56.937	54.575	138.155
		0.451	0.009	0.31	0.667	1.437	13.891	80.509	45.819	59.666	33.851	13.271	-4.862	47.389	63.12	65.594	15.828	-12.046	39.813	61.913	65.106	64.268	71.738	-15.005	54.582	59.586	140.713
		0.381	0.075	0.329	0.69	1.475	24.93	77.659	52.187	58.767	36.225	1.624	54.373	42.183	68.586	65.862	24.912	63.285	78.714	65.154	64.611	45.124	72.341	4.477	55.024	66.797	136.531
		0.367	0.074	0.315	0.679	1.435	27.447	75.608	52.634	58.107	35.7	8.677	52.434	43.91	66.57	65.462	29.258	61.956	82.539	61.173	66.399	42.174	73.226	-5.348	61.551	59.929	139.413
		0.471	0.131	0.311	0.54	1.453	35.023	82.189	47.911	54.609	37.591	-3.01	62.328	29.472	72.507	75.842	26.669	56.714	77.73	62.603	71.759	44.749	73.141	-19.45	55.039	65.76	119.05
		0.525	0.127	0.308	0.493	1.453	18.741	82.12	60.405	64.062	45.89	-23.78	65.611	31.662	77.365	77.362	4.223	58.14	89.389	64.635	69.654	63.054	76.043	-16.611	48.419	56.179	126.508
		0.946	-0.265	0.326	0.459	1.466	20.996	86.031	63.985	50.206	48.535	44.715	84.05	-49.765	48.527	59.487	16.066	56.377	95.646	62.752	70.827	47.418	77.416	-35.544	47.446	57.73	145.444
	3	0.577	0.003	0.29	0.555	1.425	18.509	84.029	10.194	53.874	57.612	0.796	50.619	11.584	50.394	63.959	1.293	50.781	11.905	50.335	63.839	70.183	80.889	13.088	64.054	44.286	160.301
		0.56	0.039	0.289	0.557	1.445	19.586	84.898	10.032	44.075	48.171	-3.59	46.852	8.504	51.962	62.186	1.77	50.264	11.789	49.514	60.922	79.952	76.293	14.872	60.217	41.123	159.699
		0.553	0.045	0.282	0.559	1.439	16.869	84.972	8.581	43.833	41.978	-7.88	47.093	10.124	44.78	63.539	-0.98	50.433	11.242	42.142	63.459	76.848	74.827	9.35	58.148	37.138	151.198
		0.551	0.033	0.285	0.592	1.461	9.294	84.005	5.179	42.255	38.479	-6.951	48.084	8.258	45.379	61.922	-2.49	50.293	8.297	42.877	61.651	79.608	73.658	3.513	48.296	44.528	164.801
		0.54	0.052	0.293	0.572	1.457	12.342	83.722	3.533	50.206	38.733	-8.189	45.472	5.318	43.347	66.62	-1.848	49.02	5.428	41.098	65.141	78.664	79.598	5.669	50.169	42.911	159.917
		0.78	0.052	0.28	0.565	1.677	12.826	81.212	5.925	55.102	45.178	-17.707	34.337	6.364	39.245	62.33	-8.835	38.911	6.722	36.835	61.043	79.827	74.611	0.05	46.935	39.857	159.111
		0.514	0.053	0.289	0.604	1.46	15.861	81.209	0.444	57.47	49.878	-7.376	39.256	8.284	47.203	67.932	-2.313	43.805	5.491	42.705	65.433	81.344	73.155	-1.15	47.633	42.915	160.123
		0.546	0.049	0.284	0.562	1.441	16.149	77.357	-1.324	43.356	51.073	-9.932	40.484	8.848	47.963	65.905	-4.973	43.847	8.285	45.029	63.732	80.276	71.757	-1.671	54.807	36.082	160.091
		0.52	0.049	0.279	0.607	1.455	16.934	76.987	-1.383	57.389	42.578	-14.735	40.449	8.377	50.543	64.519	-8.378	44.008	6.261	45.394	63.102	84.723	66.149	-10.544	62.807	53.862	160.71
		0.522	0.051	0.285	0.6	1.458	15.161	74.927	1.174	49.953	33.249	-13.235	41.309	9.936	52.694	61.261	-5.737	47.275	3.921	49.892	60.662	83.278	67.934	-9.646	53.364	49.492	158.2
	4	0.586	0.113	0.157	0.594	1.45	21.808	61.967	0.078	47.722	35.751	19.133	7.666	26.822	48.852	48.723	32.055	33.133	16.088	42.273	41.315	35.739	98.585	51.751	18.24	48.381	159.141
		0.581	0.12	0.155	0.599	1.455	23.746	59.691	-0.077	47.038	37.265	17.454	-0.421	23.769	52.181	48.204	35.223	28.351	16.097	47.089	38.915	38.463	90.728	50.856	23.2	51.901	161.31
		0.562	0.119	0.165	0.613	1.459	20.476	62.931	0.642	45.093	38.261	20.615	2.148	22.838	53.677	48.1	38.42	31.791	10.953	43.664	38.053	43.772	90.789	50.961	17.43	54.89	161.233
		0.582	0.095	0.17	0.624	1.471	17.26	58.391	2.343	45.794	35.926	22.858	2.228	21.107	53.478	46.029	34.714	31.037	12.657	46.721	40.07	30.482	93.192	52.435	12.205	49.24	159.044
		0.538	0.116	0.159	0.627	1.44	18.45	59.519	0.982	45.204	35.715	18.887	2.462	24.025	54.147	49.939	33.249	26.977	20.008	45.628	37.722	41.66	92.27	53.791	11.474	49.994	158.166
		0.593	0.105	0.148	0.602	1.448	18.924	61.48	-1.242	47.582	38.416	19.32	1.205	19.333	55.224	45.585	31.229	21.358	22.871	49.503	37.347	35.974	96.288	51.895	14.02	47.011	159.637
		0.57	0.109	0.172	0.627	1.478	17.308	61.912	-3.513	42.615	30.587	16.526	6.41	22.539	56.163	45.783	28.826	34.661	9.948	47.461	34.931	39.037	89.558	48.965	13.271	56.746	162.467
		0.566	0.105	0.172	0.613	1.456	17.915	61.589	-4.474	50.283	41.114	15.274	9.947	24.218	53.819	51.036	29.227	36.961	12.16	48.435	38.358	30.733	89.187	55.473	12.993	49.889	160.781
		0.537	0.121	0.178	0.626	1.462	21.478	61.858	-4.932	45.028	31.71	14.03	6.488	25.37	53.478	52.329	34.146	38.723	9.302	39.248	41.091	30.234	88.681	56.092	11.339	46.657	157.862
		0.532	0.133	0.169	0.619	1.453	23.383	62.41	-12.322	43.713	36.623	10.344	4.164	22.655	48.319	56.922	35.804	8.754	23.467	38.71	46.577	27.753	87.521	54.83	10.801	39.633	158.215
		0.65	0.111	0.164	0.508	1.433	18.905	62.97	-6.833	33.35	32.081	16.604	0.991	16.347	54.769	45.326	27.869	32.657	7.041	50.204	37.035	42.516	88.915	55.13	5.333	47.747	159.412
		0.74	0.101	0.171	0.455	1.467	17.167	66.803	-13.074	36.341	34.309	15.398	7.335	20.881	52.211	44.228	37.856	38.165	5.976	52.98	37.26	41.891	93.23	52.298	5.791	56.322	147.321
		0.463	0.085	0.155	0.755	1.458	17.277	68.034	-15.645	42.943	31.794	22.47	3.1	22.444	44.949	46.295	27.605	12.824	17.69	46.408	45.509	36.834	95.308	58.229	1.509	63.362	160.691
		0.546	0.077	0.168	0.664	1.455	19.192	65.35	-11.713	46.111	36.49	21.535	-0.259	22.583	47.445	46.072	30.573	-3.465	35.622	39.15	39.816	38.541	89.816	51.461	6.018	49.493	159.459
	5	0.452	0.11	0.243	0.617	1.422	24.514	63.13	74.249	54.537	35.399	9.204	47.73	30.622	53.578	58.963	14.673	64.766	54.943	52.701	59.054	105.341	120.552	-42.295	60.658	57.505	170.304
		0.446	0.109	0.239	0.65	1.444	22.376	61.774	68.752	47.674	47.146	8.382	45.77	30.78	50.685	54.438	9.996	64.124	52.238	51.84	52.546	113.544	112.372	-46.986	62.772	64.297	127.274
		0.465	0.09	0.25	0.655	1.46	21.594	67.15	73.871	44.106	45.317	12.037	43.474	26.544	52.364	53.465	13.486	58.812	46.962	54.238	45.605	106.393	116.606	-65.049	52.684	63.587	160.556
		0.464	0.077	0.262	0.663	1.466	23.981	64.755	75.826	42.047	42.97	5.89	50.367	22.819	52.92	61.623	7.507	62.3	48.202	51.12	59.29	108.39	113.796	-45.539	56.595	54.829	147.382
		0.398	0.074	0.248	0.712	1.432	21.053	52.566	78.549	52.444	39.301	-1.219	57.094	27.792	49.091	65.34	-1.905	72.358	58.377	46.749	64.852	105.961	120.261	-48.269	46.798	61.781	154.619
		0.437	0.09	0.24	0.672	1.439	18.237	56.358	76.435	46.809	41.408	8.21	48.283	37.095	44.837	55.234	9.569	69.695	62.975	44.491	49.331	109.825	120.941	-64.365	54.488	54.096	132.879
		0.395	0.089	0.253	0.724	1.461	17.581	55.57	86.981	46.059	32.91	4.031	48.433	30.314	46.278	52.073	5.746	63.629	53.815	46.555	54.331	109.842	117.563	-53.537	57.972	63.175	144.954
		0.414	0.087	0.241	0.693	1.435	14.661	55.344	79.473	46.517	31.351	10.05	38.428	37.167	43.664	45.791	14.485	58.551	56.617	45.406	41.272	110.379	115.494	-53.832	58.529	57.035	146.079
		0.432	0.076	0.25	0.689	1.447	17.682	63.987	88.751	43.898	31.157	6.022	51.899	23.445	49.779	58.645	13.317	60.023	50.661	52.531	50.501	107.106	112.828	-45.501	55.482	53.067	161.406
		0.459	0.093	0.252	0.646	1.45	18.994	59.799	82.935	39.674	42.7	1.122	55.485	24.537	50.88	55.163	10.256	64.424	54.872	52.273	50.019	105.192	112.304	-45.694	59.965	48.144	130.533
		0.477	0.112	0.243	0.609	1.441	25.073	66.096	84.762	47.74	40.395	2.619	48.571	22.361	48.312	50.529	7.454	60.524	49.623	48.448	47.777	106.869	109.886	-49.9	60.117	61.167	161.56
		0.422	0.076	0.252	0.709	1.459	24.22	66.922	89.394	44.225	44.284	5.959	47.328	34.084	51.146	56.815	11.274	57.859	56.546	49.489	52.721	105.965	106.876	-41.798	52.649	57.394	159.055
		0.391	0.11	0.24	0.693	1.434	16.276	60.419	82.628	45.845	19.905	9.086	34.144	42.81	45.633	51.529	13.833	58.611	60.906	49.139	44.678	108.145	111.26	-58.18	55.366	58.65	130.813
	6	0.427	0.156	0.21	0.657	1.45	2.1	59.481	89.898	45.758	30.946	20.464	27.438	32.26	45.326	43.646	30.995	33.123	91.183	51.663	56.399	71.447	66.51	22.89	57.399	47.2	170.3
		0.502	0.113	0.216	0.631	1.462	3.851	58.429	87.908	38.583	40.542	25.059	28.676	32.002	46.194	55.308	27.714	37.153	90.558	50.79	61.328	109.977	67.864	-7.802	53.558	46.557	169.7
		0.453	0.144	0.215	0.64	1.452	1.822	56.457	89.142	40.182	39.185	19.727	29.346	26.039	49.389	43.798	27.33	35.39	85.353	53.69	54.586	130.069	64.844	-3.842	56.265	56.557	145.2
		0.439	0.166	0.225	0.643	1.473	3.391	57.234	90.228	39.011	35.76	19.698	23.306	22.561	46.208	44.389	28.933	31.454	82.316	48.871	53.551	144.21	66.937	-16.031	54.652	50.646	141.23
		0.433	0.119	0.226	0.675	1.453	3.366	58.323	91.7	42.027	33.088	24.707	23.218	25.239	46.4	42.903	27.036	27.804	80.545	53.222	51.383	126.814	67.59	-11.163	48.496	48.012	169.901
		0.458	0.145	0.215	0.619	1.437	0.846	58.929	97.667	39.568	34.42	23.231	28.242	24.022	43.821	45.061	26.648	32.172	81.136	49.297	51.517	140.31	68.393	-19.973	55.589	48.663	149.1
		0.492	0.142	0.221	0.62	1.475	-2.766	58.564	102.941	41.809	35.459	20.634	30.328	26.898	46.724	44.665	27.986	34.969	82.618	55.745	54.924	150.302	72.569	-26.947	52.074	53.462	169.3
		0.706	0.137	0.215	0.378	1.436	-3.03	64.174	103.447	34.16	40.875	21.346	37.947	33.437	47.702	45.749	21.081	47.013	91.553	48.915	51.862	142.267	74.938	-32.332	59.009	54.431	167.87
		0.546	0.315	0.292	0.629	1.782	3.668	63.718	102.486	42.499	38.543	27.861	35.149	26.636	37.918	49.715	25.396	43.313	95.118	36.866	48.484	125.967	74.249	-28.502	52.408	52.882	169.702
		0.529	0.137	0.218	0.479	1.363	0.083	64.751	103.753	33.793	39.18	25.168	31.335	30.557	40.929	42.376	26.174	39.752	96.142	44.914	51.217	28.706	70.933	-54	33.943	41.561	146.211
		0.439	0.148	0.222	0.644	1.453	-0.261	63.887	104.672	31.04	35.49	25.229	29.442	26.933	43.088	41.919	31.605	35.288	84.643	44.523	51.557	168.228	76.568	-44.456	47.114	51.886	178.862
		0.539	0.146	0.218	0.551	1.454	2.219	67.463	107.418	28.549	38.946	27.36	31.731	29.875	41.273	41.414	28.58	41.845	94.384	43.729	54.064	148.135	78.165	-44.683	45.052	42.923	179.215
		0.436	0.15	0.224	0.656	1.466	-2.374	61.805	109.931	44.667	43.309	21.204	28.226	23.486	41.714	41.77	26.97	34.571	87.211	44.235	52.33	145.357	77.823	-39.689	48.087	54.576	141.43
		0.408	0.167	0.223	0.648	1.446	-1.507	64.268	115.111	38.391	40.94	20.347	25.628	25.954	45.621	46.066	26.908	40.181	99.629	44.365	59.133	83.851	77.34	-34.222	48.6	45.035	143.321
	7	0.626	0.099	0.174	0.561	1.46	21.258	69.294	-35.515	21.949	28.242	0.788	34.927	16.438	35.987	56.661	48.741	51.607	-22.094	40.011	57.38	92.034	78.725	3.831	37.681	33.265	157.151
		0.7	0.122	0.169	0.447	1.438	33.607	66.993	-27.363	30.528	38.402	-5.47	40.666	17.512	30.46	64.939	54.687	50.941	-23.412	24.923	57.074	88.966	85.167	10.417	35.767	34.676	151.31
		0.71	0.129	0.16	0.449	1.448	28.633	73.507	-29.62	25.951	34.032	-4.348	46.588	10.716	35.49	64.284	52.799	60.657	-30.12	33.92	59.102	94.602	71.624	12.789	26.946	38.962	161.233
		0.67	0.122	0.191	0.501	1.484	25.835	72.45	-25.633	27.48	30.263	-3.26	43.311	7.705	33.654	63.042	55.452	56.963	-26.553	30.325	56.398	89.599	71.418	9.221	31.21	38.193	139.044
		0.72	0.119	0.178	0.427	1.444	26.891	72.318	-22.844	23.099	32.086	-7.031	45.055	4.892	38.59	63.426	52.307	62.33	-31.366	37.17	60.255	93.987	72.557	14.416	24.422	31.731	158.166
		1.015	0.119	0.172	0.398	1.704	39.503	71.425	-16.874	22.087	34.796	-8.744	47.977	5.831	36.269	71.639	55.864	58.365	-34.464	30.74	61.148	89.366	73.638	12.154	32.34	35.416	157.621
		0.874	0.131	0.191	0.515	1.711	25.675	68.05	-19.478	21.736	33.527	-7.152	44.504	8.353	37.498	61.067	58.532	51.752	-27.643	33.526	58.214	91.195	70.478	8.415	29.14	40.215	162.467
		0.742	0.111	0.203	0.406	1.462	32.668	69.154	-11.508	28	35.04	-9.525	40.106	6.461	34.457	58.425	47.802	52.327	-15.489	34.039	55.33	99.326	76.246	15.957	34.059	34.853	160.781
		0.689	0.129	0.193	0.427	1.438	37.413	71.986	-7.814	23.737	36.734	-13.716	36.63	11.653	34.216	63.99	50.099	47.137	-5.826	28.585	57.532	94.273	82.012	6.797	31.09	33.007	157.862
		0.654	0.126	0.188	0.474	1.442	26.562	74.108	-11.398	21.743	34.986	-10.3	43.332	3.299	37.263	60.83	50.877	50.605	-12.681	33.847	57.486	98.758	75.696	5.565	27.926	33.558	158.215
		0.668	0.141	0.177	0.468	1.454	24.414	74.288	-5.652	21.12	33.453	-12.114	48.614	1.857	37.562	64.065	51.651	55.705	-14.678	35.064	57.787	94.948	80.506	0.776	29.767	35.687	159.412
		0.66	0.137	0.185	0.472	1.454	33.068	72.907	-3.345	18.955	30.553	-13.868	48.329	2.713	37.864	65.705	52.656	47.73	-11.557	36.821	58.959	92.195	77.375	-0.644	31.177	34.193	147.321
